# Supplementary material
Source: PubMed Central journal article supplement (PMC6710566)
Supplement: rstb20190373supp1.pdf [file rstb20190373supp1.pdf]

SUPPLEMENTARY MATERIAL:

TABLE S1. DATASET USED IN THIS STUDY.

*Philosophical Transactions B*

**Links between personality, early natal nutrition, and survival of a threatened bird**

Kate M. Richardson<sup>1</sup>, Elizabeth H. Parlato<sup>1</sup>, Leila K. Walker<sup>2,3</sup>, Kevin A. Parker<sup>4</sup>, John G. Ewen<sup>2</sup>, and Doug P. Armstrong<sup>1</sup>

<sup>1</sup> Wildlife Ecology Group, Massey University, Private Bag 11222, Palmerston North, New Zealand.

<sup>2</sup> Institute of Zoology, Zoological Society of London, Regent's Park, London, UK.

<sup>3</sup> Department of Zoology, University of Cambridge, Downing Street, Cambridge CB2 3EJ, UK.

<sup>4</sup> Parker Conservation, PO Box 130, Warkworth, Auckland, New Zealand.

 These authors contributed equally to this work.

| ID    | Sex <sup>1</sup> | Age (days) | Clutch <sup>2</sup> | Treated <sup>3</sup> | C <sup>4</sup> | N <sup>5</sup> | Mother | Activity <sup>6</sup> | Acclimation <sup>7</sup> | Latency <sup>8</sup> | Boldness <sup>9</sup> | Last <sup>10</sup> | Mar-11 <sup>11</sup> | Apr-11 | Sep-11 | Feb-12 | Sep-12 | Feb-13 | Sep-13 | Feb-14 |
|-------|------------------|------------|---------------------|----------------------|----------------|----------------|--------|-----------------------|--------------------------|----------------------|-----------------------|--------------------|----------------------|--------|--------|--------|--------|--------|--------|--------|
| 89103 | 1                | 134        | 1                   | 1                    | 0              | 0              | 83267  | 17                    | 8                        | -                    | 0                     | 8                  | 1                    | NA     | 0      | 0      | 0      | 0      | 0      | 0      |
| 89104 | 1                | 113        | 1                   | 1                    | 0              | 1              | 79134  | 3                     | 900                      | -                    | 0                     | 2                  | 1                    | 1      | NA     | NA     | NA     | NA     | NA     | NA     |
| 89109 | 1                | 112        | 1                   | 1                    | 1              | 0              | 79132  | NA                    | NA                       | NA                   | NA                    | 8                  | 1                    | NA     | 0      | 0      | 0      | 0      | 0      | 0      |
| 89110 | 1                | 120        | 1                   | 1                    | 0              | 0              | 79132  | 57                    | 149                      | -                    | 0                     | 8                  | 1                    | 1      | 1      | 1      | 1      | 1      | 1      | 0      |
| 89111 | 1                | 118        | 1                   | 1                    | 0              | 0              | 79132  | 124                   | NA                       | -                    | 0                     | 2                  | 1                    | 1      | NA     | NA     | NA     | NA     | NA     | NA     |
| 89113 | 0                | 129        | 1                   | 1                    | 1              | 1              | 76999  | 74                    | 68                       | 0:08                 | 1                     | 8                  | 1                    | 1      | 1      | 1      | 1      | 0      | 0      | 0      |
| 89114 | 1                | 115        | 1                   | 1                    | 0              | 1              | 76999  | 57                    | 113                      | 0:05                 | 1                     | 2                  | 1                    | 1      | NA     | NA     | NA     | NA     | NA     | NA     |
| 89117 | 1                | 107        | 1                   | 1                    | 0              | 1              | 86570  | 115                   | 482                      | 3:32                 | 1                     | 8                  | 1                    | 1      | 1      | 1      | 1      | 1      | 0      | 0      |
| 89126 | 0                | 105        | 1                   | 1                    | 0              | 0              | 71159  | 147                   | 168                      | 1:08                 | 1                     | 2                  | 1                    | 1      | NA     | NA     | NA     | NA     | NA     | NA     |
| 89128 | 0                | 107        | 1                   | 1                    | 1              | 0              | 83262  | 181                   | 131                      | 0:23                 | 1                     | 8                  | 1                    | 1      | 1      | 0      | 0      | 0      | 0      | 0      |
| 89129 | 0                | 117        | 1                   | 1                    | 1              | 1              | 76987  | 53                    | 197                      | -                    | 0                     | 2                  | 1                    | 1      | NA     | NA     | NA     | NA     | NA     | NA     |
| 89131 | 0                | 104        | 1                   | 1                    | 0              | 1              | 76987  | 111                   | 900                      | 1:21                 | 1                     | 2                  | 1                    | 1      | NA     | NA     | NA     | NA     | NA     | NA     |
| 89134 | 0                | 120        | 1                   | 1                    | 1              | 0              | 76991  | 81                    | 113                      | 0:43                 | 1                     | 8                  | 1                    | NA     | 0      | 0      | 0      | 0      | 0      | 0      |
| 89139 | 1                | 112        | 1                   | 1                    | 1              | 0              | 76991  | 63                    | 272                      | 0:18                 | 1                     | 8                  | 1                    | NA     | 0      | 0      | 0      | 0      | 0      | 0      |
| 89145 | 1                | 102        | 1                   | 1                    | 0              | 1              | 71034  | 164                   | 427                      | 1:00                 | 1                     | 2                  | 1                    | 1      | NA     | NA     | NA     | NA     | NA     | NA     |

<sup>1</sup> 1 = male, 0 = female

<sup>2</sup> 1 = first clutch, 2 = second clutch

<sup>3</sup> 1 = received experimental supplementary feeding, 0 = did not receive experimental supplementary feeding

<sup>4</sup> 1 = received carotenoids in nest, 0 = did not receive carotenoids in nest

<sup>5</sup> 1 = received protein in nest, 0 = did not receive protein in nest

<sup>6</sup> Activity score: the number of movements (hops or flights) made by the bird in the first five minutes in the cage

<sup>7</sup> Acclimation time: the time (seconds) between release into the cage and the first body shake

<sup>8</sup> Latency to move to novel side (mins:secs). - = did not move to novel side

<sup>9</sup> 1 = bold (moved to novel side within 5 minutes), 0 = shy (did not move to novel side within 5 minutes)

<sup>10</sup> Survey number when removed for translocation elsewhere or last survey if not removed

<sup>11</sup> Survival data. 1 = observed during survey, 0 = not observed during survey, NA = not surveyed or not available for observation due to translocation to another site

|       |   |     |   |   |   |   |       |     |     |       |    |   |   |    |    |    |    |    |    |    |
|-------|---|-----|---|---|---|---|-------|-----|-----|-------|----|---|---|----|----|----|----|----|----|----|
| 89146 | 0 | 118 | 1 | 1 | 1 | 1 | 71034 | 119 | 179 | 0:18  | 1  | 2 | 1 | 1  | NA | NA | NA | NA | NA | NA |
| 89160 | 0 | 114 | 1 | 1 | 0 | 1 | 86637 | 15  | 79  | -     | 0  | 8 | 1 | 1  | 1  | 0  | 0  | 0  | 0  | 0  |
| 89802 | 1 | 112 | 1 | 1 | 1 | 1 | 88251 | 24  | 267 | -     | 0  | 8 | 1 | 1  | 1  | 1  | 1  | 1  | 1  | 1  |
| 89804 | 1 | 100 | 1 | 1 | 1 | 1 | 88251 | 52  | 900 | 0:03  | 1  | 2 | 1 | 1  | NA | NA | NA | NA | NA | NA |
| 89809 | 1 | 103 | 1 | 1 | 0 | 0 | 83313 | 66  | 31  | -     | 0  | 2 | 1 | 1  | NA | NA | NA | NA | NA | NA |
| 89811 | 1 | 112 | 1 | 1 | 0 | 0 | 83313 | 1   | 836 | -     | 0  | 8 | 1 | 1  | 1  | 1  | 1  | 0  | 0  | 0  |
| 89813 | 0 | 123 | 1 | 1 | 1 | 0 | 86542 | 177 | 25  | 0:50  | 1  | 8 | 1 | NA | 0  | 0  | 0  | 0  | 0  | 0  |
| 89815 | 1 | 101 | 1 | 1 | 0 | 0 | 86542 | 146 | 277 | 0:23  | 1  | 2 | 1 | 1  | NA | NA | NA | NA | NA | NA |
| 89822 | 1 | 124 | 1 | 1 | 0 | 0 | 86507 | 27  | 51  | -     | 0  | 8 | 1 | 1  | 1  | 0  | 0  | 0  | 0  | 0  |
| 89824 | 0 | 116 | 1 | 1 | 1 | 0 | 86529 | 173 | 96  | NA    | NA | 2 | 1 | 1  | NA | NA | NA | NA | NA | NA |
| 89826 | 0 | 104 | 1 | 1 | 0 | 1 | 83297 | 100 | 95  | 4:23  | 1  | 8 | 1 | 1  | 1  | 0  | 0  | 0  | 0  | 0  |
| 89827 | 1 | 102 | 1 | 1 | 0 | 1 | 83297 | 54  | NA  | -     | 0  | 8 | 1 | 1  | 1  | 0  | 0  | 0  | 0  | 0  |
| 89828 | 1 | 101 | 1 | 1 | 1 | 1 | 83297 | 80  | 528 | 2:46  | 1  | 8 | 1 | 1  | 1  | 1  | 1  | 0  | 0  | 0  |
| 89829 | 1 | 104 | 1 | 1 | 1 | 1 | 83297 | 15  | 74  | -     | 0  | 8 | 1 | NA | 0  | 0  | 0  | 0  | 0  | 0  |
| 89831 | 0 | 96  | 1 | 1 | 1 | 0 | 83207 | 148 | 50  | NA    | NA | 2 | 1 | 1  | NA | NA | NA | NA | NA | NA |
| 89833 | 1 | 96  | 1 | 1 | 1 | 1 | 83371 | 7   | NA  | NA    | NA | 2 | 1 | 1  | NA | NA | NA | NA | NA | NA |
| 89834 | 1 | 96  | 1 | 1 | 0 | 1 | 83371 | 0   | 625 | -     | 0  | 8 | 1 | NA | 0  | 0  | 0  | 0  | 0  | 0  |
| 89836 | 0 | 107 | 1 | 1 | 0 | 1 | 77628 | 31  | NA  | 0:29  | 1  | 2 | 1 | 1  | NA | NA | NA | NA | NA | NA |
| 89837 | 1 | 99  | 1 | 1 | 1 | 1 | 77628 | 92  | 215 | 1:40  | 1  | 2 | 1 | 1  | NA | NA | NA | NA | NA | NA |
| 89838 | 0 | 109 | 1 | 1 | 0 | 1 | 77628 | 59  | NA  | 2:51  | 1  | 8 | 1 | NA | 0  | 0  | 0  | 0  | 0  | 0  |
| 89843 | 1 | 97  | 1 | 1 | 1 | 1 | 72011 | 83  | 152 | 0:02  | 1  | 8 | 1 | 1  | 1  | 1  | 1  | 1  | 1  | 0  |
| 89848 | 0 | 110 | 1 | 1 | 0 | 1 | 79333 | 139 | 115 | 0:09  | 1  | 2 | 1 | 1  | NA | NA | NA | NA | NA | NA |
| 89850 | 0 | 109 | 1 | 1 | 1 | 0 | 86652 | 130 | 399 | 0:53  | 1  | 8 | 1 | 1  | 1  | 1  | 1  | 1  | 0  | 0  |
| 89851 | 1 | 119 | 1 | 1 | 0 | 0 | 86652 | 31  | 93  | -     | 0  | 8 | 1 | NA | 0  | 0  | 0  | 0  | 0  | 0  |
| 89852 | 0 | 113 | 1 | 1 | 1 | 0 | 86520 | 85  | 263 | 14:19 | 0  | 2 | 1 | 1  | NA | NA | NA | NA | NA | NA |

|       |   |     |   |   |   |   |       |     |     |      |   |   |   |    |    |    |    |    |    |    |
|-------|---|-----|---|---|---|---|-------|-----|-----|------|---|---|---|----|----|----|----|----|----|----|
| 89853 | 1 | 116 | 1 | 1 | 1 | 0 | 86520 | 71  | NA  | 1:00 | 1 | 8 | 1 | 1  | 1  | 0  | 0  | 0  | 0  | 0  |
| 89854 | 1 | 109 | 1 | 1 | 0 | 0 | 86520 | 164 | 210 | 0:01 | 1 | 8 | 1 | 1  | 1  | 1  | 1  | 1  | 1  | 1  |
| 89858 | 1 | 114 | 1 | 1 | 0 | 1 | 86565 | 99  | 62  | 0:05 | 1 | 2 | 1 | 1  | NA | NA | NA | NA | NA | NA |
| 89859 | 1 | 110 | 1 | 1 | 1 | 0 | 86656 | 165 | 163 | 0:01 | 1 | 8 | 1 | 1  | 1  | 0  | 0  | 0  | 0  | 0  |
| 89864 | 1 | 118 | 1 | 1 | 1 | 1 | 79312 | 80  | 164 | 0:02 | 1 | 2 | 1 | 1  | NA | NA | NA | NA | NA | NA |
| 89865 | 1 | 127 | 1 | 1 | 1 | 1 | 79312 | 142 | 93  | 0:39 | 1 | 2 | 1 | 1  | NA | NA | NA | NA | NA | NA |
| 89867 | 1 | 105 | 1 | 1 | 1 | 1 | 79337 | 180 | 179 | 0:01 | 1 | 2 | 1 | 1  | NA | NA | NA | NA | NA | NA |
| 89868 | 0 | 127 | 1 | 1 | 0 | 1 | 79337 | 222 | 900 | 0:22 | 1 | 2 | 1 | 1  | NA | NA | NA | NA | NA | NA |
| 89869 | 1 | 107 | 1 | 1 | 0 | 0 | 79246 | 84  | NA  | 0:10 | 1 | 8 | 1 | 1  | 1  | 1  | 1  | 0  | 0  | 0  |
| 89870 | 1 | 116 | 1 | 1 | 1 | 0 | 79246 | 74  | 170 | -    | 0 | 8 | 1 | 1  | 1  | 1  | 1  | 0  | 0  | 0  |
| 89874 | 0 | 113 | 1 | 1 | 0 | 0 | 79224 | 55  | NA  | 0:40 | 1 | 2 | 1 | 1  | NA | NA | NA | NA | NA | NA |
| 89876 | 0 | 104 | 1 | 1 | 0 | 0 | 79224 | 184 | 900 | 0:01 | 1 | 2 | 1 | 1  | NA | NA | NA | NA | NA | NA |
| 89877 | 0 | 102 | 1 | 1 | 1 | 0 | 79298 | 39  | 900 | 0:53 | 1 | 2 | 1 | 1  | NA | NA | NA | NA | NA | NA |
| 89893 | 1 | 125 | 1 | 1 | 1 | 1 | 88274 | 1   | 636 | -    | 0 | 8 | 1 | 1  | 1  | 1  | 1  | 1  | 1  | 1  |
| 89900 | 0 | 106 | 1 | 1 | 0 | 0 | 86523 | 177 | 151 | 1:04 | 1 | 8 | 1 | NA | 0  | 0  | 0  | 0  | 0  | 0  |
| 89902 | 1 | 118 | 1 | 1 | 1 | 0 | 83244 | 135 | 45  | 0:27 | 1 | 2 | 1 | 1  | NA | NA | NA | NA | NA | NA |
| 89909 | 0 | 99  | 1 | 1 | 1 | 0 | 76933 | 128 | 61  | 3:45 | 1 | 2 | 1 | 1  | NA | NA | NA | NA | NA | NA |
| 89911 | 1 | 104 | 1 | 1 | 1 | 0 | 76933 | 126 | 49  | 0:50 | 1 | 2 | 1 | 1  | NA | NA | NA | NA | NA | NA |
| 89912 | 0 | 116 | 1 | 1 | 0 | 0 | 76933 | 199 | 409 | 1:31 | 1 | 2 | 1 | 1  | NA | NA | NA | NA | NA | NA |
| 89915 | 1 | 105 | 1 | 1 | 0 | 1 | 79180 | 97  | 67  | -    | 0 | 8 | 1 | NA | 0  | 0  | 0  | 0  | 0  | 0  |
| 89916 | 1 | 99  | 1 | 1 | 1 | 1 | 88216 | 37  | 92  | 0:15 | 1 | 8 | 1 | 1  | 1  | 1  | 1  | 1  | 1  | 1  |
| 89918 | 1 | 104 | 1 | 1 | 1 | 0 | 83225 | 167 | 362 | 0:35 | 1 | 8 | 1 | 1  | 1  | 1  | 1  | 0  | 0  | 0  |
| 89920 | 1 | 112 | 1 | 1 | 0 | 0 | 83225 | 140 | 117 | 3:33 | 1 | 8 | 1 | 1  | 1  | 1  | 1  | 1  | 0  | 0  |
| 89922 | 0 | 101 | 1 | 1 | 1 | 0 | 76925 | 195 | 190 | 0:01 | 1 | 8 | 1 | 1  | 1  | 1  | 1  | 0  | 0  | 0  |
| 89923 | 1 | 110 | 1 | 1 | 0 | 0 | 88275 | 119 | 29  | -    | 0 | 2 | 1 | 1  | NA | NA | NA | NA | NA | NA |

|       |   |     |   |   |   |   |       |     |     |      |    |   |   |    |    |    |    |    |    |    |
|-------|---|-----|---|---|---|---|-------|-----|-----|------|----|---|---|----|----|----|----|----|----|----|
| 89924 | 1 | 107 | 1 | 1 | 1 | 0 | 88275 | 140 | 49  | 0:08 | 1  | 2 | 1 | 1  | NA | NA | NA | NA | NA | NA |
| 89925 | 1 | 100 | 1 | 1 | 0 | 1 | 88260 | 162 | 224 | -    | 0  | 8 | 1 | NA | 0  | 0  | 0  | 0  | 0  | 0  |
| 89927 | 1 | 100 | 1 | 1 | 1 | 1 | 88260 | 264 | 417 | 0:14 | 1  | 8 | 1 | 1  | 1  | 0  | 0  | 0  | 0  | 0  |
| 89931 | 0 | 118 | 1 | 1 | 1 | 1 | 86602 | 93  | 121 | 0:30 | 1  | 8 | 1 | 1  | 1  | 1  | 1  | 1  | 0  | 0  |
| 89937 | 0 | 108 | 1 | 1 | 0 | 1 | 88235 | 242 | 202 | -    | 0  | 8 | 1 | NA | 0  | 0  | 0  | 0  | 0  | 0  |
| 89939 | 1 | 95  | 1 | 1 | 0 | 0 | 86796 | 2   | 399 | 0:10 | 1  | 8 | 1 | 1  | 1  | 0  | 0  | 0  | 0  | 0  |
| 89941 | 1 | 94  | 1 | 1 | 1 | 0 | 79175 | 127 | 38  | 0:13 | 1  | 2 | 1 | 1  | NA | NA | NA | NA | NA | NA |
| 89943 | 0 | 104 | 1 | 1 | 0 | 0 | 79175 | 3   | 336 | 0:21 | 1  | 8 | 1 | NA | 0  | 0  | 0  | 0  | 0  | 0  |
| 89945 | 0 | 96  | 1 | 1 | 0 | 1 | 86739 | 175 | NA  | 0:36 | 1  | 8 | 1 | NA | 0  | 0  | 0  | 0  | 0  | 0  |
| 89946 | 1 | 108 | 1 | 1 | 1 | 1 | 86739 | 224 | 162 | 0:02 | 1  | 2 | 1 | 1  | NA | NA | NA | NA | NA | NA |
| 89950 | 1 | 106 | 1 | 1 | 1 | 0 | 86682 | 75  | 125 | -    | 0  | 8 | 1 | NA | 0  | 0  | 0  | 0  | 0  | 0  |
| 89951 | 0 | 99  | 1 | 1 | 0 | 0 | 79284 | 155 | 37  | 3:29 | 1  | 8 | 1 | 1  | 1  | 1  | 1  | 1  | 0  | 0  |
| 89952 | 1 | 103 | 1 | 1 | 0 | 0 | 79284 | 173 | 114 | 0:04 | 1  | 8 | 1 | NA | 0  | 0  | 0  | 0  | 0  | 0  |
| 89957 | 0 | 105 | 1 | 1 | 0 | 1 | 86579 | 218 | 16  | 1:06 | 1  | 2 | 1 | 1  | NA | NA | NA | NA | NA | NA |
| 89958 | 0 | 105 | 1 | 1 | 1 | 1 | 86579 | 195 | 48  | 0:35 | 1  | 2 | 1 | 1  | NA | NA | NA | NA | NA | NA |
| 89962 | 1 | 52  | 2 | 0 | 0 | 0 | 79134 | 3   | 461 | 5:15 | 0  | 8 | 1 | NA | 0  | 0  | 0  | 0  | 0  | 0  |
| 89965 | 0 | 58  | 2 | 0 | 0 | 0 | 77628 | 157 | 900 | -    | 0  | 8 | 1 | NA | 0  | 0  | 0  | 0  | 0  | 0  |
| 89966 | 0 | 58  | 2 | 0 | 0 | 0 | 77628 | 110 | 247 | -    | 0  | 8 | 1 | NA | 0  | 0  | 0  | 0  | 0  | 0  |
| 89967 | 0 | 64  | 2 | 0 | 0 | 0 | 77628 | 133 | 426 | 1:47 | 1  | 8 | 1 | 1  | 1  | 1  | 1  | 1  | 1  | 1  |
| 89969 | 1 | 58  | 2 | 0 | 0 | 0 | 76925 | 18  | 900 | 4:21 | 1  | 8 | 1 | 1  | 1  | 1  | 1  | 0  | 0  | 0  |
| 89972 | 0 | 59  | 2 | 0 | 0 | 0 | 79246 | 160 | 372 | -    | 0  | 2 | 1 | 1  | NA | NA | NA | NA | NA | NA |
| 89973 | 1 | 45  | 2 | 0 | 0 | 0 | 79246 | 243 | 402 | -    | 0  | 8 | 1 | NA | 0  | 0  | 0  | 0  | 0  | 0  |
| 89974 | 1 | 51  | 2 | 0 | 0 | 0 | 79246 | 152 | 86  | -    | 0  | 8 | 1 | 1  | 1  | 0  | 0  | 0  | 0  | 0  |
| 89977 | 0 | 44  | 2 | 0 | 0 | 0 | 86529 | 173 | 52  | 0:07 | 1  | 8 | 1 | 1  | 1  | 1  | 1  | 1  | 1  | 1  |
| 89978 | 0 | 41  | 2 | 0 | 0 | 0 | 83331 | 194 | 426 | NA   | NA | 8 | 1 | 1  | 1  | 1  | 1  | 1  | 1  | 0  |

|       |   |    |   |   |   |   |       |     |     |      |   |   |   |    |    |    |    |    |    |    |
|-------|---|----|---|---|---|---|-------|-----|-----|------|---|---|---|----|----|----|----|----|----|----|
| 89981 | 1 | 61 | 2 | 0 | 0 | 0 | 79338 | 106 | 191 | -    | 0 | 8 | 1 | 1  | 1  | 0  | 0  | 0  | 0  | 0  |
| 89982 | 1 | 65 | 2 | 0 | 0 | 0 | 86529 | 168 | 65  | 0:09 | 1 | 8 | 1 | NA | 0  | 0  | 0  | 0  | 0  | 0  |
| 89983 | 1 | 55 | 2 | 0 | 0 | 0 | 86674 | 48  | 62  | -    | 0 | 2 | 1 | 1  | NA | NA | NA | NA | NA | NA |
| 89984 | 1 | 61 | 2 | 0 | 0 | 0 | 86674 | 224 | 173 | 0:01 | 1 | 8 | 1 | 1  | 1  | 1  | 1  | 1  | 0  | 0  |
| 89985 | 0 | 55 | 2 | 0 | 0 | 0 | 86674 | 255 | 395 | 0:01 | 1 | 8 | 1 | 1  | 1  | 1  | 1  | 1  | 1  | 1  |
| 89986 | 0 | 59 | 2 | 0 | 0 | 0 | 79312 | 216 | 900 | -    | 0 | 8 | 1 | NA | 0  | 0  | 0  | 0  | 0  | 0  |
| 89988 | 0 | 51 | 2 | 0 | 0 | 0 | 79312 | 188 | 683 | 0:01 | 1 | 8 | 1 | NA | 0  | 0  | 0  | 0  | 0  | 0  |
